# Supplementary material for: Comparing organ donation decisions for next-of-kin versus the self: results of a national survey
Source: HighWire-hosted journal article supplement (doi:10.1136/bmjopen-2021-051273), 2021-11-01
Supplement: bmjopen-2021-051273supp001_data_supplement.pdf [file bmjopen-2021-051273supp001_data_supplement.pdf]

Appendix 1

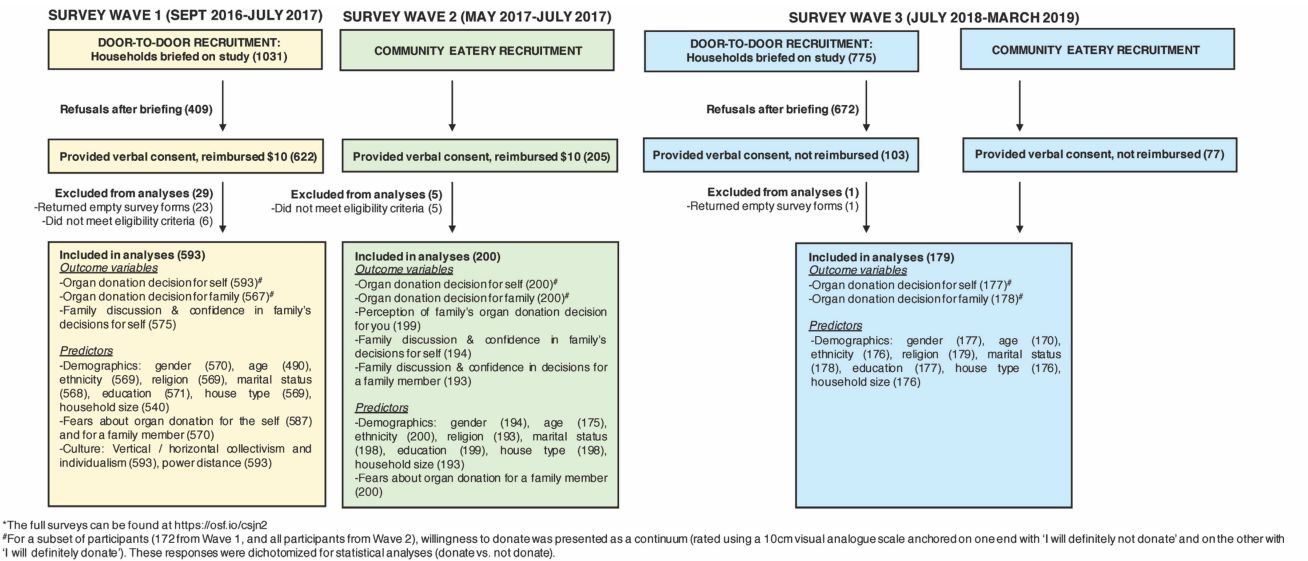

\*The full surveys can be found at <https://osf.io/csjp2>  
<sup>#</sup>For a subset of participants (172 from Wave 1, and all participants from Wave 2), willingness to donate was presented as a continuum (rated using a 10cm visual analogue scale anchored on one end with 'I will definitely not donate' and on the other with 'I will definitely donate'). These responses were dichotomized for statistical analyses (donate vs. not donate).

Figure S1. Flow diagram of participant inclusion across the three waves of data collection.

As shown in Figure S1, data collection proceeded in three waves. For sensitivity analyses, we repeated – where possible – the analyses for each wave of data collection separately.

1. Deciding for the self versus a family member

In the main manuscript, we recorded the proportion of participants who were willing to donate their own organs but who refused family donation. As shown in Table S1, this proportion did not differ significantly as a function of data collection wave;  $\chi^2(2, N = 882) = 4.80, p = 0.09$ .

Table S1. Willing donors who refused, presented as a function of survey wave

| Number of willing donors who refused (%) |                 |
|------------------------------------------|-----------------|
| Wave 1                                   | 176/516 (34.1%) |
| Wave 2                                   | 20/137 (14.6%)  |
| Wave 3                                   | 32/177 (18.1%)  |

2. Understanding the role of overconfidence in family decision-making

In Waves 1 and 2, participants were asked: (i) whether they had discussed organ donation with their families, (ii) whether they thought their family members were aware of their views; and (iii) how confident they were that their families would carry out their wishes upon death.

As shown in Table S2, we found no evidence that discussion rates differed as a function of survey wave;  $\chi^2(2, N = 698) = 3.31, p = 0.07$ . Similarly, we found no evidence that either awareness or confidence differed according to survey wave;  $t(767) = -0.001, p = 0.999$  and  $t(764) = -1.32, p = 0.19$  respectively (Table S3).

Table S2. Organ donation discussions, presented as a function of survey wave

| Number of participants who have discussed organ donation (%) |                |
|--------------------------------------------------------------|----------------|
| Wave 1                                                       | 98/510 (19.2%) |
| Wave 2                                                       | 48/188 (25.5%) |

Table S3. Family awareness and confidence in family decision-making, presented as a function of survey wave

|        | Mean rating for family awareness (SE) | Mean rating for confidence (SE) |
|--------|---------------------------------------|---------------------------------|
| Wave 1 | 2.56 (0.07)                           | 3.76 (0.06)                     |
| Wave 2 | 2.56 (0.10)                           | 3.90 (0.09)                     |
